# Supplementary material for: Ultralow-input single-tube linked-read library method enables short-read second-generation sequencing systems to routinely generate highly accurate and economical long-range sequencing information
Source: HighWire-hosted journal article supplement (doi:10.1101/gr.260380.119), 2020-06-01
Supplement: Revised_Supplemental_Table_S8_.pdf [file Revised_Supplemental_Table_S8_.pdf]

**Supplemental Table S8.** QUAST (Gurevich et al. 2013) analysis of *de novo* assemblies of NA12878 from different linked read methods (Zheng et al. 2016; Zhang et al. 2017; Wang et al. 2019) and nanopore method (Jain et al. 2018). Assembly results from other linked read methods and nanopore long read method were cited from Supplemental Table S5 in Wang et al, 2019.

| Assembly                   | TELL-Seq      | stLFR-1*      | stLFR-2*      | 10x*          | Nanopore*     |
|----------------------------|---------------|---------------|---------------|---------------|---------------|
| # contigs (>= 0 bp)        | 34,085        | 18,102        | 18,905        | 17,016        | 2,337         |
| # contigs (>= 25000 bp)    | 1,181         | 965           | 948           | 697           | 1,819         |
| # contigs (>= 50000 bp)    | 542           | 500           | 500           | 351           | 1,332         |
| Total length (>= 0 bp)     | 2,979,445,840 | 2,899,386,838 | 2,893,558,199 | 2,867,683,417 | 2,866,880,913 |
| Total length (>= 25000 bp) | 2,794,100,219 | 2,816,263,478 | 2,812,836,296 | 2,804,290,035 | 2,858,326,432 |
| Total length (>= 50000 bp) | 2,772,210,571 | 2,800,220,687 | 2,797,538,549 | 2,792,294,955 | 2,840,893,649 |
| Largest contig             | 109,183,970   | 104,958,599   | 86,747,726    | 109,375,584   | 50,410,306    |
| Total length               | 2,979,445,840 | 2,848,642,889 | 2,836,789,635 | 2,824,111,036 | 2,866,386,869 |
| Reference length           | 3,099,922,541 | 3,099,922,541 | 3,099,922,541 | 3,099,922,541 | 3,099,922,541 |
| GC (%)                     | 40.91         | 40.88         | 40.82         | 40.84         | 40.86         |
| Reference GC (%)           | 40.87         | 40.87         | 40.87         | 40.87         | 40.87         |
| N50                        | 31,462,027    | 28,877,588    | 26,308,501    | 45,263,628    | 7,667,013     |
| # misassemblies            | 1,987         | 4,096         | 3,824         | 2,750         | 6,938         |
| Genome fraction (%)        | 93.732        | 92.976        | 92.628        | 93.776        | 94.611        |
| # N's per 100 kbp          | 6419.8        | 3039.36       | 2852.41       | 1085.71       | 0             |
| # mismatches per 100 kbp   | 114.07        | 106.08        | 105.01        | 104.98        | 168.00        |
| # indels per 100 kbp       | 25.61         | 25.64         | 25.56         | 28.32         | 165.25        |
| Largest alignment          | 23,573,913    | 10,614,129    | 9,113,736     | 16,615,675    | 6,837,121     |
| NA50                       | 4,302,918     | 1,863,160     | 1,983,491     | 2,863,578     | 906,345       |

\* Wang et al, 2019.
