# Supplementary material for: Ultralow-input single-tube linked-read library method enables short-read second-generation sequencing systems to routinely generate highly accurate and economical long-range sequencing information
Source: PubMed Central journal article supplement — Genome Res. 2020 Jun;30(6):898–909. doi: 10.1101/gr.260380.119 (PMC7370886; doi:10.1101/gr.260380.119), 2020-06
Supplement: supp_gr.260380.119_Supplemental_Fig_S1.pdf [file supp_gr.260380.119_Supplemental_Fig_S1.pdf]

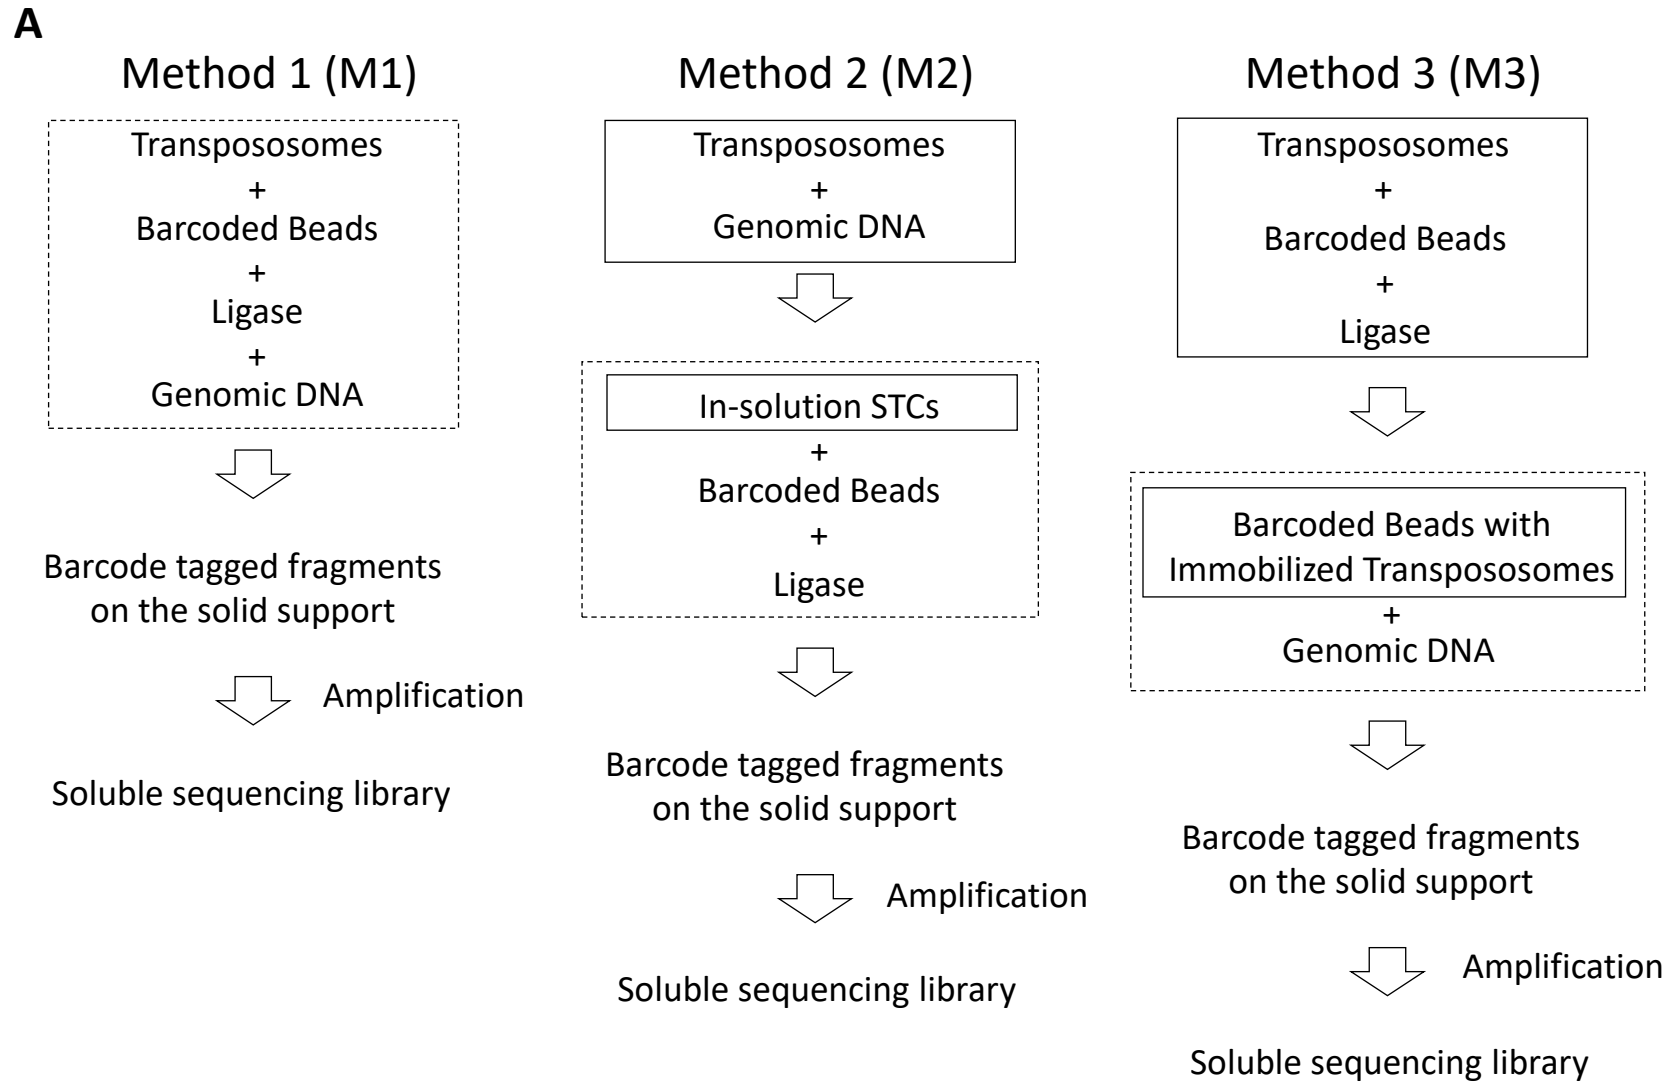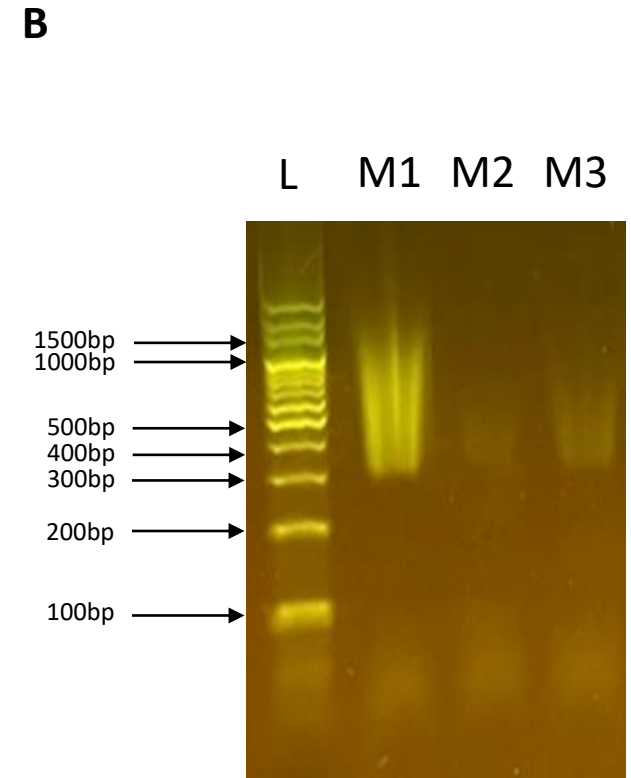

**Supplemental Figure S1.** Three different transposase based clonal barcoding methods without droplet facilitated compartmentation. **(A)** Overview of three different transposase based clonal barcoding methods. **(B)** E-gel picture of amplified barcoded libraries using the three different transposase based clonal barcoding methods.
