# Supplementary material for: Ultralow-input single-tube linked-read library method enables short-read second-generation sequencing systems to routinely generate highly accurate and economical long-range sequencing information
Source: PubMed Central journal article supplement — Genome Res. 2020 Jun;30(6):898–909. doi: 10.1101/gr.260380.119 (PMC7370886; doi:10.1101/gr.260380.119), 2020-06
Supplement: supp_gr.260380.119_Supplemental_Fig_S2.pdf [file supp_gr.260380.119_Supplemental_Fig_S2.pdf]

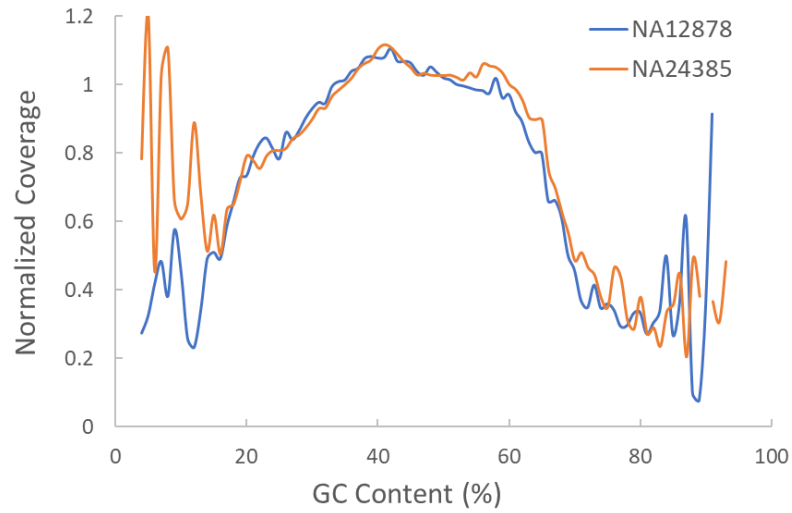

**Supplemental Figure S2.** GC-coverage plot for the human samples. Normalized coverage is a relative measure of sequence coverage by the reads at a particular GC content. For x-axis, human genome sequence is divided into bins or windows based on the percentage of G + C content ranging from 0 - 100%.
