# Supplementary material for: Ultralow-input single-tube linked-read library method enables short-read second-generation sequencing systems to routinely generate highly accurate and economical long-range sequencing information
Source: PubMed Central journal article supplement — Genome Res. 2020 Jun;30(6):898–909. doi: 10.1101/gr.260380.119 (PMC7370886; doi:10.1101/gr.260380.119), 2020-06
Supplement: supp_gr.260380.119_Supplemental_Fig_S3.pdf [file supp_gr.260380.119_Supplemental_Fig_S3.pdf]

**A**

hg19: Chr5:104432113-104503673 -> hg38:Chr5:105096412-105167972

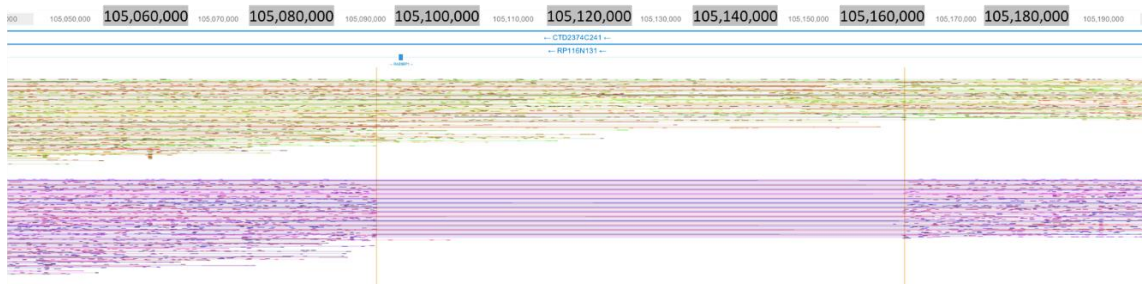

**B**

hg19: Chr1:189704509-189783359 -> hg38: Chr1:189735379-189814229

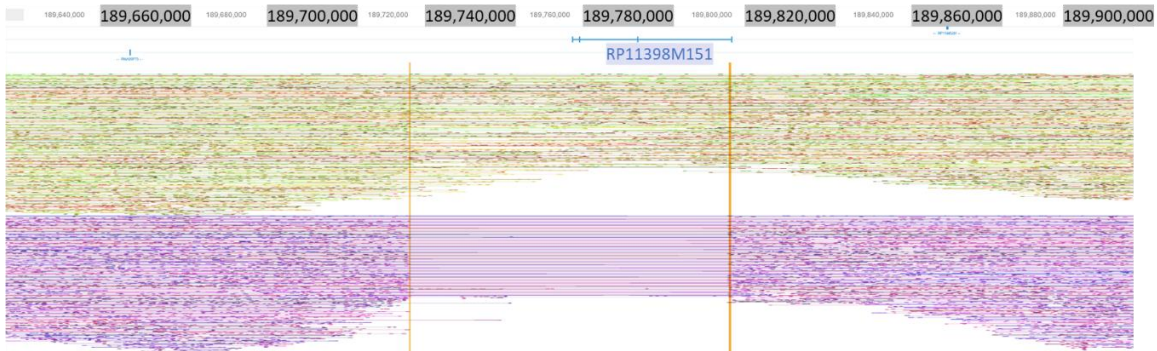

**C**

hg19: Chr3:65189000-65213999 -> hg38: Chr3:65203325-65228324

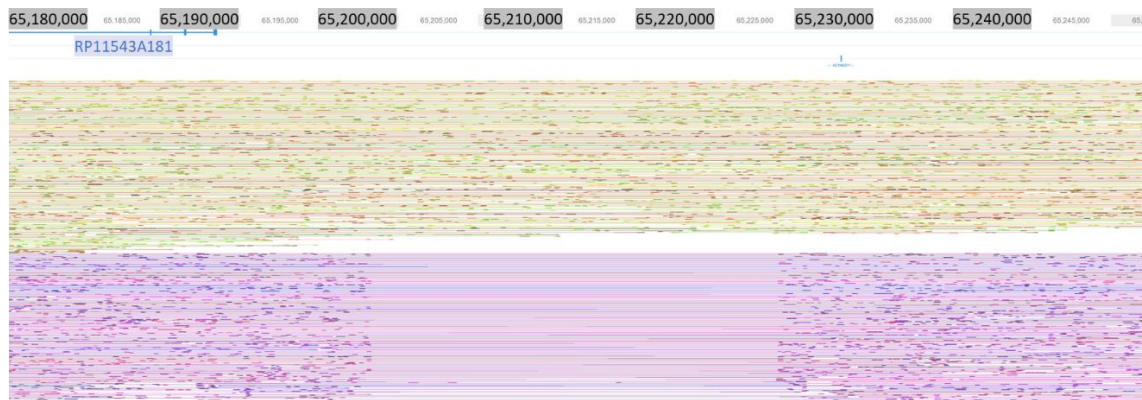

**Supplemental Figure S3.** Phased read graphs from TELL-Seq data on the NA12878 sample. **(A)** TELL-Seq data showed a heterozygous deletion on Chromosome 5: 104,432,113-104,503,673. 10x data (Zheng et al. 2016) called this region as a heterozygous deletion, while stLFR data (Wang et al. 2019) called this region as a homozygous deletion. **(B)** A heterozygous deletion on Chromosome 1: 189,704,509-189,783,359. **(C)** A heterozygous deletion on Chromosome 3: 65,189,000-65,213,999. GRCh38(hg38) coordinates were used for visualization data.
