# Supplementary material for: Ultralow-input single-tube linked-read library method enables short-read second-generation sequencing systems to routinely generate highly accurate and economical long-range sequencing information
Source: PubMed Central journal article supplement — Genome Res. 2020 Jun;30(6):898–909. doi: 10.1101/gr.260380.119 (PMC7370886; doi:10.1101/gr.260380.119), 2020-06
Supplement: supp_gr.260380.119_Supplemental_Fig_S4.pdf [file supp_gr.260380.119_Supplemental_Fig_S4.pdf]

**A**

hg19: Chr4:116167000-116176999 -> hg38: Chr4:115245844-115255843

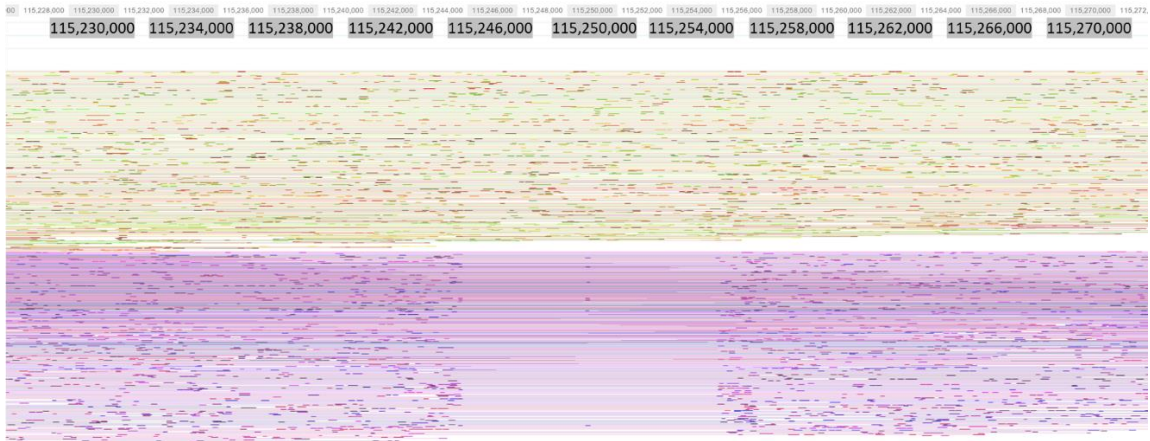

**B**

hg19: Chr4:187094000-187097999 -> hg38: Chr4:186172846-186176845

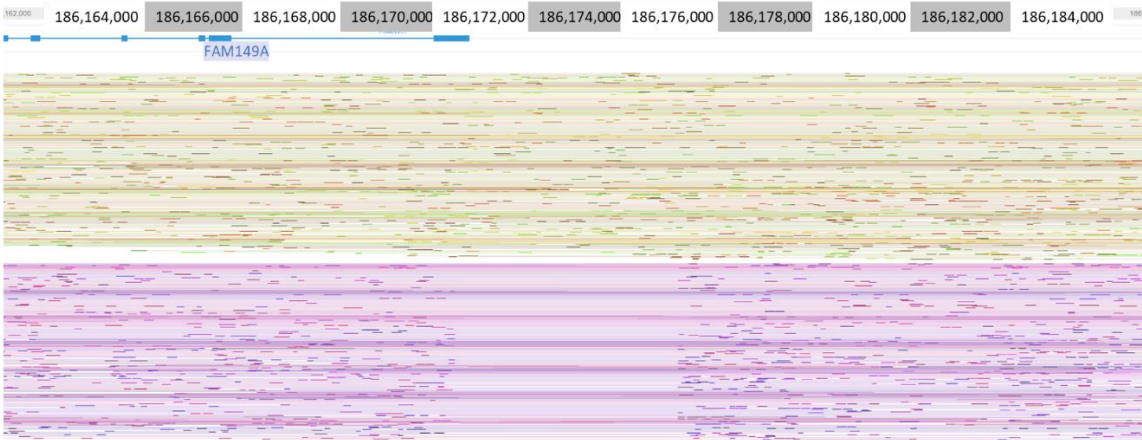

**C**

hg19: Chr6:78967194-79036419 -> hg38: Chr6:78257477-78326702

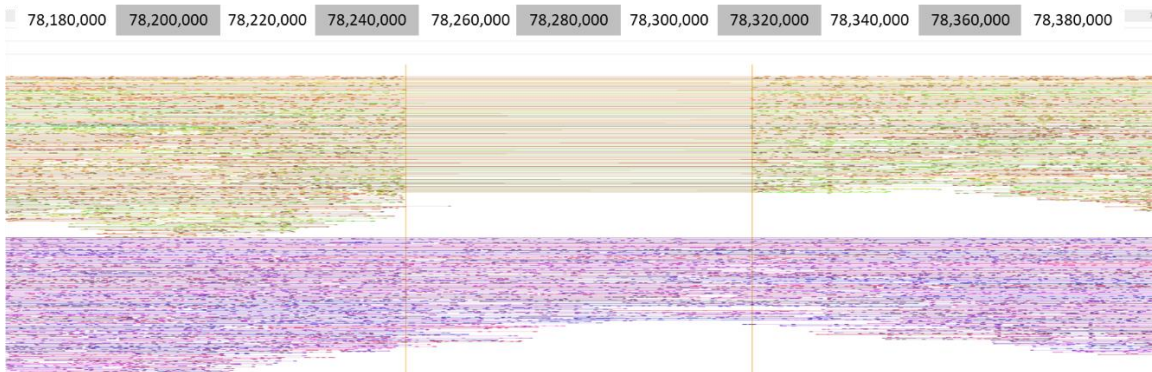

**Supplemental Figure S4.** Phased read graphs from TELL-Seq data on the NA12878 sample. **(A)** TELL-Seq data showed a heterozygous deletion on Chromosome 4: 116,167,000-116,176,999. **(B)** A heterozygous deletion on Chromosome 4: 187,094,000-187,097,999. hg38 coordinates were used for visualization data. **(C)** A heterozygous deletion on Chromosome 6: 78,967,194-79,036,419. GRCh38 (hg38) coordinates were used for visualization data.
