# Supplementary material for: Ultralow-input single-tube linked-read library method enables short-read second-generation sequencing systems to routinely generate highly accurate and economical long-range sequencing information
Source: PubMed Central journal article supplement — Genome Res. 2020 Jun;30(6):898–909. doi: 10.1101/gr.260380.119 (PMC7370886; doi:10.1101/gr.260380.119), 2020-06
Supplement: supp_gr.260380.119_Supplemental_Fig_S5.pdf [file supp_gr.260380.119_Supplemental_Fig_S5.pdf]

**A**

hg19: Chr7:110182000-110187999 -> hg38: Chr7:110541943-110547942

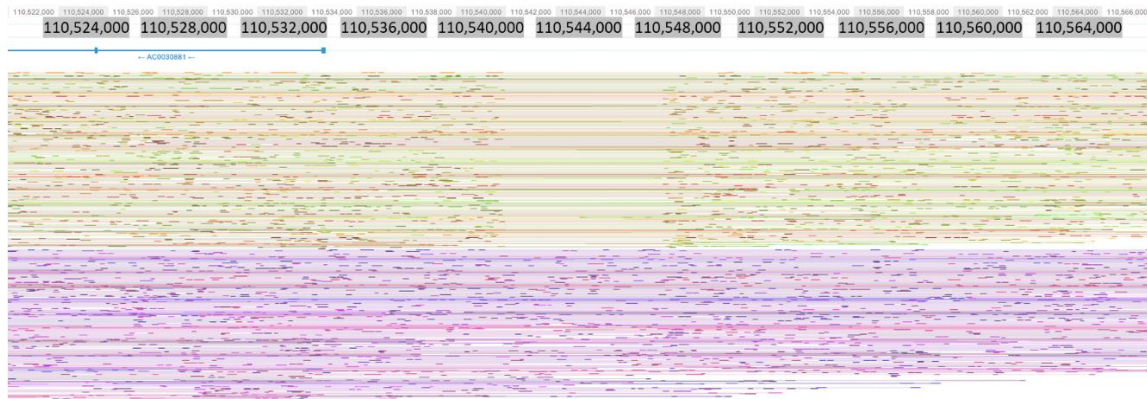

**B**

hg19: Chr8:39232074-39387229 -> hg38: Chr8:39374555-39529710

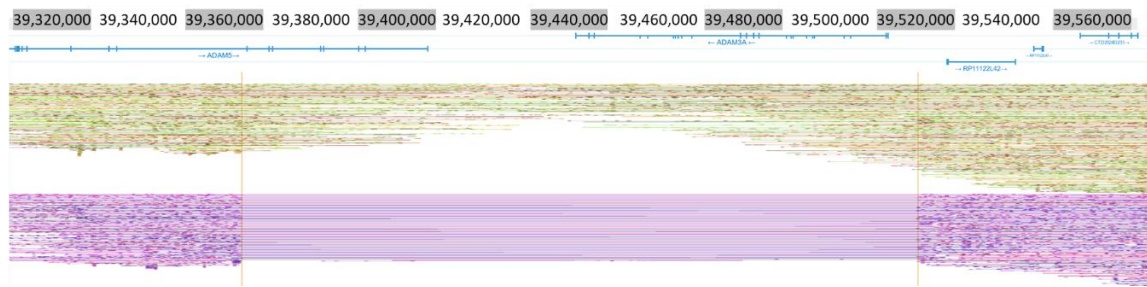

**C**

hg19: Chr16:62545000-62549999 -> hg38: Chr16:62511096-62516095

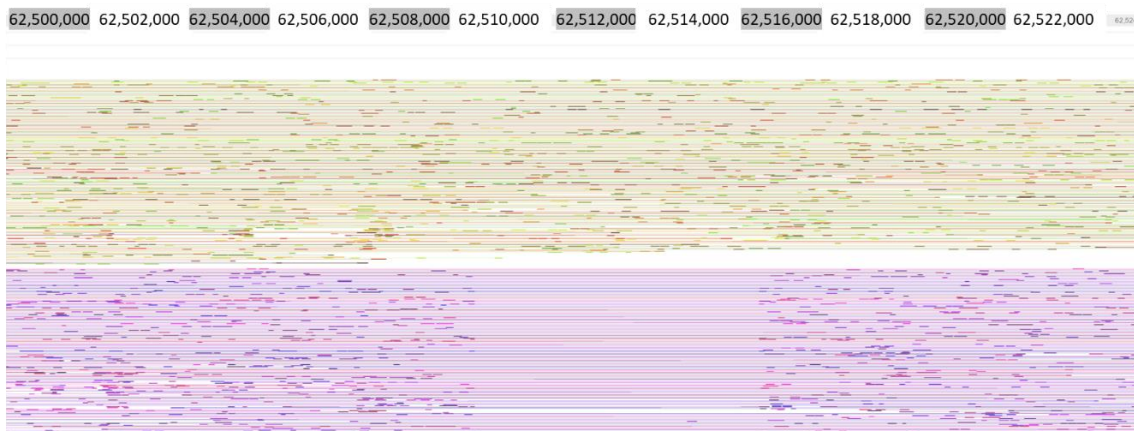

**Supplemental Figure S5.** Phased read graphs from TELL-Seq data on the NA12878 sample. **(A)** TELL-Seq data showed a heterozygous deletion on Chromosome 7: 110,182,000-110,187,999. **(B)** A heterozygous deletion on Chromosome 8: 39,232,074-39,387,229. **(C)** A heterozygous deletion on Chromosome 16: 62,545,000-62,549,999. GRCh38 (hg38) coordinates were used for visualization data.
