# Supplementary material for: Ultralow-input single-tube linked-read library method enables short-read second-generation sequencing systems to routinely generate highly accurate and economical long-range sequencing information
Source: PubMed Central journal article supplement — Genome Res. 2020 Jun;30(6):898–909. doi: 10.1101/gr.260380.119 (PMC7370886; doi:10.1101/gr.260380.119), 2020-06
Supplement: supp_gr.260380.119_Supplemental_Table_S1.pdf [file supp_gr.260380.119_Supplemental_Table_S1.pdf]

**Supplemental Table S1.** *De novo* assembly results using TuringAssembler on DSM-15921 sample

---

|                                  |           |
|----------------------------------|-----------|
| Global/local <i>k</i> -mer sizes | 105/35    |
| # contigs                        | 30        |
| # contigs (>= 0 bp)              | 30        |
| # contigs (>= 1000 bp)           | 20        |
| # contigs (>= 5000 bp)           | 3         |
| Largest contig                   | 3,607,461 |
| Total length                     | 3,666,615 |
| Total length (>= 0 bp)           | 3,666,615 |
| Total length (>= 1000 bp)        | 3,659,685 |
| Total length (>= 5000 bp)        | 3,622,804 |
| N50                              | 3,607,461 |
| GC (%)                           | 31.38     |
| # N's per 100 kbp                | 5.45      |

---
