# Supplementary material for: Ultralow-input single-tube linked-read library method enables short-read second-generation sequencing systems to routinely generate highly accurate and economical long-range sequencing information
Source: PubMed Central journal article supplement — Genome Res. 2020 Jun;30(6):898–909. doi: 10.1101/gr.260380.119 (PMC7370886; doi:10.1101/gr.260380.119), 2020-06
Supplement: supp_gr.260380.119_Supplemental_Table_S2.pdf [file supp_gr.260380.119_Supplemental_Table_S2.pdf]

**Supplemental Table S2.** Comparison of *C. cateniformis* assemblies deposited in NCBI database with TELL-Seq results (DSM-15921)

| Strain/Assembly | Contigs | N50 (kb) | L50 | Total length (kb) |
|-----------------|---------|----------|-----|-------------------|
| 29_1/ADKX01     | 80      | 120      | 11  | 3,857             |
| D6/AKCB01       | 9       | 2,786    | 1   | 3,861             |
| JCM/BBDT01      | 101     | 91       | 10  | 3,585             |
| OM02-34/QSVJ01  | 100     | 91       | 12  | 3,755             |
| OM02-5/QSVG01   | 96      | 86       | 12  | 3,750             |
| OF01-6/QSCY01   | 108     | 81       | 15  | 3,803             |
| DSM-15921       | 30      | 3,607    | 1   | 3,666             |
