# Supplementary material for: Ultralow-input single-tube linked-read library method enables short-read second-generation sequencing systems to routinely generate highly accurate and economical long-range sequencing information
Source: PubMed Central journal article supplement — Genome Res. 2020 Jun;30(6):898–909. doi: 10.1101/gr.260380.119 (PMC7370886; doi:10.1101/gr.260380.119), 2020-06
Supplement: supp_gr.260380.119_Supplemental_Table_S3.pdf [file supp_gr.260380.119_Supplemental_Table_S3.pdf]

**Supplemental Table S3.** BUSCO analysis results using Firmicutes as the bacterial lineage on all the available *C. cateniformis* genome assemblies

| Assembly                        | UC15921 | ADKX01 | AKCB01 | BBDT01 | QSCY01 | QSVG01 | QSVJ01 |
|---------------------------------|---------|--------|--------|--------|--------|--------|--------|
| Complete BUSCO                  | 221     | 219    | 221    | 183    | 221    | 221    | 221    |
| Complete and single-copy BUSCOs | 221     | 216    | 221    | 182    | 218    | 218    | 218    |
| Complete and duplicated BUSCOs  | 0       | 3      | 0      | 1      | 3      | 3      | 3      |
| Fragmented BUSCOs               | 0       | 0      | 0      | 29     | 0      | 0      | 0      |
| Missing BUSCOs                  | 11      | 13     | 11     | 20     | 11     | 11     | 11     |
| Total BUSCO groups searched     | 232     | 232    | 232    | 232    | 232    | 232    | 232    |
| % Complete                      | 95.3%   | 94.4%  | 95.3%  | 78.9%  | 95.3%  | 95.3%  | 95.3%  |
