# Supplementary material for: Ultralow-input single-tube linked-read library method enables short-read second-generation sequencing systems to routinely generate highly accurate and economical long-range sequencing information
Source: PubMed Central journal article supplement — Genome Res. 2020 Jun;30(6):898–909. doi: 10.1101/gr.260380.119 (PMC7370886; doi:10.1101/gr.260380.119), 2020-06
Supplement: supp_gr.260380.119_Supplemental_Table_S4.pdf [file supp_gr.260380.119_Supplemental_Table_S4.pdf]

**Supplemental Table S4.** Summary of TELL-Seq SNP and Indel variant calling results compared with GIAB reference on NA12878 sample

| Variant Type | Analysis  | Recall Rate | Precision Rate |
|--------------|-----------|-------------|----------------|
| SNV          | No Filter | 99.2%       | 97.7%          |
|              | Filtered  | 99.1%       | 98.9%          |
| INDEL        | No Filter | 89.8%       | 79.9%          |
|              | Filtered  | 89.8%       | 89.3%          |
