# Supplementary material for: Ultralow-input single-tube linked-read library method enables short-read second-generation sequencing systems to routinely generate highly accurate and economical long-range sequencing information
Source: PubMed Central journal article supplement — Genome Res. 2020 Jun;30(6):898–909. doi: 10.1101/gr.260380.119 (PMC7370886; doi:10.1101/gr.260380.119), 2020-06
Supplement: supp_gr.260380.119_Supplemental_Table_S5.pdf [file supp_gr.260380.119_Supplemental_Table_S5.pdf]

**Supplemental Table S5.** Eight-digit *HLA* allele types used for nine *HLA* genes as reference for comparison with TELL-seq phasing results.

| <b>HLA ID_Gene_Parental Origin</b> | <b>AlleleName</b> |
|------------------------------------|-------------------|
| HLA00001_HLA-A_Paternal            | A*01:01:01:01     |
| HLA00043_HLA-A_Maternal            | A*11:01:01:01     |
| HLA00146_HLA-B_Paternal            | B*08:01:01:01     |
| HLA00376_HLA-B_Maternal            | B*56:01:01:01     |
| HLA00401_HLA-C_Maternal            | C*01:02:01:01     |
| HLA00433_HLA-C_Paternal            | C*07:01:01:01     |
| HLA00662_HLA-DRA_Maternal          | DRA*01:01:01:01   |
| HLA01593_HLA-DRA_Paternal          | DRA*01:02:02:01   |
| HLA00499_HLA-DPA1_Paternal         | DPA1*01:03:01:01  |
| HLA00504_HLA-DPA1_Maternal         | DPA1*02:01:01:01  |
| HLA00521_HLA-DPB1_Paternal         | DPB1*04:01:01:01  |
| HLA00531_HLA-DPB1_Maternal         | DPB1*14:01:01:01  |
| HLA00601_HLA-DQA1_Maternal         | DQA1*01:01:01:01  |
| HLA00613_HLA-DQA1_Paternal         | DQA1*05:01:01:01  |
| HLA00622_HLA-DQB1_Paternal         | DQB1*02:01:01:01  |
| HLA00638_HLA-DQB1_Maternal         | DQB1*05:01:01:01  |
| HLA00664_HLA-DRB1_Maternal         | DRB1*01:01:01:01  |
| HLA00671_HLA-DRB1_Paternal         | DRB1*03:01:01:01  |
