# Supplementary material for: Ultralow-input single-tube linked-read library method enables short-read second-generation sequencing systems to routinely generate highly accurate and economical long-range sequencing information
Source: PubMed Central journal article supplement — Genome Res. 2020 Jun;30(6):898–909. doi: 10.1101/gr.260380.119 (PMC7370886; doi:10.1101/gr.260380.119), 2020-06
Supplement: supp_gr.260380.119_Supplemental_Table_S6.pdf [file supp_gr.260380.119_Supplemental_Table_S6.pdf]

**Supplemental Table S6.** Summary of TELL-seq SV called by Long Ranger software in comparison with SV calls from 1000 Genome Project Consortium (1000G) on the NA12878 sample and from GIAB Consortium on the NA24385 sample.

| <b>Sample</b>  | <b>SV Type</b> | <b>TELL-seq Calls<br/>(by Long<br/>Ranger)</b> | <b>Overlap with<br/>1000G Calls</b> | <b>1000G Calls</b> | <b>Overlap with<br/>TELL-seq<br/>Calls</b> | <b>Precision</b> | <b>Recall</b> |
|----------------|----------------|------------------------------------------------|-------------------------------------|--------------------|--------------------------------------------|------------------|---------------|
| <b>NA12878</b> | DEL            | 5,342                                          | 1,545                               | 1,824              | 1,600                                      | 29%              | 88%           |
|                | DUP            | 338                                            | 64                                  | 211                | 84                                         | 19%              | 40%           |
|                | INV            | 656                                            | 95                                  | 190                | 93                                         | 14%              | 49%           |

  

| <b>Sample</b>  | <b>SV Type</b> | <b>TELL-seq Calls<br/>(by Long<br/>Ranger)</b> | <b>Overlap with<br/>GIAB Calls</b> | <b>GIAB Calls</b> | <b>Overlap with<br/>TELL-seq<br/>Calls</b> | <b>Precision</b> | <b>Recall</b> |
|----------------|----------------|------------------------------------------------|------------------------------------|-------------------|--------------------------------------------|------------------|---------------|
| <b>NA24385</b> | DEL            | 5,198                                          | 3,985                              | 29,799            | 6,284                                      | 77%              | 21%           |
|                | DUP            | 260                                            | -                                  | -                 | -                                          | -                | -             |
|                | INV            | 450                                            | -                                  | -                 | -                                          | -                | -             |
