# Supplementary material for: Ultralow-input single-tube linked-read library method enables short-read second-generation sequencing systems to routinely generate highly accurate and economical long-range sequencing information
Source: PubMed Central journal article supplement — Genome Res. 2020 Jun;30(6):898–909. doi: 10.1101/gr.260380.119 (PMC7370886; doi:10.1101/gr.260380.119), 2020-06
Supplement: supp_gr.260380.119_Supplemental_Table_S7_.pdf [file supp_gr.260380.119_Supplemental_Table_S7_.pdf]

**Supplemental Table S7.** QCAST (Gurevich et al. 2013) analysis of *de novo* assembly of NA12878 from TELL-Seq data.

| Assembly                    | TELL-Seq*        |
|-----------------------------|------------------|
| # contigs (>= 0 bp)         | 34,085           |
| # contigs (>= 1000 bp)      | 34,085           |
| # contigs (>= 5000 bp)      | 13,584           |
| # contigs (>= 10000 bp)     | 7,508            |
| # contigs (>= 25000 bp)     | 1,181            |
| # contigs (>= 50000 bp)     | 542              |
| Total length (>= 0 bp)      | 2,979,445,840    |
| Total length (>= 1000 bp)   | 2,979,445,840    |
| Total length (>= 5000 bp)   | 2,929,255,010    |
| Total length (>= 10000 bp)  | 2,886,528,456    |
| Total length (>= 25000 bp)  | 2,794,100,219    |
| Total length (>= 50000 bp)  | 2,772,210,571    |
| # contigs                   | 34,085           |
| Largest contig              | 109,183,970      |
| Total length                | 2,979,445,840    |
| Reference length            | 3,099,922,541    |
| GC (%)                      | 40.91            |
| Reference GC (%)            | 40.87            |
| N50                         | 31,462,027       |
| NG50                        | 29,617,959       |
| N75                         | 12,845,396       |
| NG75                        | 10,385,879       |
| L50                         | 28               |
| LG50                        | 30               |
| L75                         | 65               |
| LG75                        | 73               |
| # misassemblies             | 1,987            |
| # misassembled contigs      | 939              |
| Misassembled contigs length | 2,677,809,708    |
| # local misassemblies       | 1,549            |
| # scaffold gap ext. mis.    | 9,216            |
| # scaffold gap loc. mis.    | 20,150           |
| # unaligned mis. contigs    | 74               |
| # unaligned contigs         | 4158 + 1220 part |
| Unaligned length            | 23,049,908       |
| Genome fraction (%)         | 93.732           |
| Duplication ratio           | 1.075            |
| # N's per 100 kbp           | 6419.8           |
| # mismatches per 100 kbp    | 114.07           |
| # indels per 100 kbp        | 25.61            |
| Largest alignment           | 23,573,913       |
| Total aligned length        | 2,771,334,486    |
| NA50                        | 4,302,918        |
| NGA50                       | 4,086,890        |
| NA75                        | 1,495,528        |
| NGA75                       | 1,123,338        |
| LA50                        | 196              |
| LGA50                       | 211              |
| LA75                        | 473              |
| LGA75                       | 543              |

\*All statistics are based on contigs of size >= 500 bp, unless otherwise noted (e.g., "# contigs (>= 0 bp)" and "Total length (>= 0 bp)" include all contigs).

Gurevich A, Saveliev V, Vyahhi N, Tesler G. 2013. QCAST: quality assessment tool for genome assemblies. *Bioinformatics* **29**: 1072–1075. doi:10.1093/bioinformatics/btt086
